# Supplementary material
Source: publisher figshare collection journal article supplement (https://acs.figshare.com/ndownloader/files/9131848)
Supplement: Supplementary file 1 [file 9131848]

## **SUPPORTING INFORMATION**

### **Inactivation of *Ascaris* eggs in human fecal material through *in-situ* production of carboxylic acids**

**Lauren A. Harroff<sup>1</sup>, Janice L. Liotta<sup>2</sup>, Dwight D. Bowman<sup>2</sup>, Largus T. Angenent<sup>1, 3, 4\*</sup>**

<sup>1</sup>Department of Biological and Environmental Engineering, Cornell University, Ithaca, NY 14853, USA

<sup>2</sup> Department of Microbiology and Immunology, College of Veterinary Medicine, Cornell University, Ithaca, NY 14853, USA

<sup>3</sup>Atkinson Center for a Sustainable Future, Ithaca, NY 14853, USA

<sup>4</sup>Center for Applied Geosciences, University of Tübingen, Tübingen, Germany

\*Corresponding author: Hölderlingstr. 12, 72074 Tübingen, Germany; Tel: +49-7071-601322; Fax: +49-7071-6011308; Email: l.angenent@uni-tuebingen.de

Supporting Information Pages: 13

Supporting Information Figures: 7

Supporting Information Tables: 6

**Table S1. Treatments for Experiment 2.**

| pH | [HA] <sup>a</sup><br><i>n</i> -Butyric Acid<br>(mM) | [HA] <sup>a</sup><br><i>n</i> -Caproic Acid<br>(mM) | [HA+A <sup>-</sup> ] <sup>b</sup><br><i>n</i> -Butyric Acid<br>(mM) | [HA+A <sup>-</sup> ] <sup>b</sup><br><i>n</i> -Caproic Acid<br>(mM) |
|----|-----------------------------------------------------|-----------------------------------------------------|---------------------------------------------------------------------|---------------------------------------------------------------------|
| 2  | 100                                                 | 10.0                                                | 100                                                                 | 10.0                                                                |
| 2  | 135                                                 | 13.5                                                | 135                                                                 | 13.5                                                                |
| 2  | 170                                                 | 17.0                                                | 170                                                                 | 17.0                                                                |
| 2  | 205                                                 | 20.5                                                | 205                                                                 | 20.5                                                                |
| 2  | 240                                                 | 24.0                                                | 240                                                                 | 24.0                                                                |
| 4  | 100                                                 | 10.0                                                | 115                                                                 | 11.3                                                                |
| 4  | 135                                                 | 13.5                                                | 155                                                                 | 15.3                                                                |
| 4  | 170                                                 | 17.0                                                | 196                                                                 | 19.2                                                                |
| 4  | 205                                                 | 20.5                                                | 236                                                                 | 23.2                                                                |
| 4  | 240                                                 | 24.0                                                | 276                                                                 | 27.2                                                                |
| 5  | 100                                                 | 10.0                                                | 251                                                                 | 23.2                                                                |
| 5  | 135                                                 | 13.5                                                | 339                                                                 | 31.3                                                                |
| 5  | 170                                                 | 17.0                                                | 427                                                                 | 39.4                                                                |
| 5  | 205                                                 | 20.5                                                | 515                                                                 | 47.5                                                                |
| 5  | 240                                                 | 24.0                                                | 603                                                                 | 55.6                                                                |

<sup>a</sup> [HA] represents the concentration of the uncharged species only. The same five concentrations of [HA] were used at each pH level.

<sup>b</sup> [HA + A<sup>-</sup>] represents the total concentration of uncharged acid *plus* charged conjugate base

**Table S2. Treatments for Experiment 3.**

| Acid              | Exposure Time<br>(d) | Concentrations Tested<br>(mM)            |
|-------------------|----------------------|------------------------------------------|
| <i>n</i> -Butyric | 2                    | 250, 275, 300*, 325, 350, 370*, 400, 450 |
|                   | 6                    | 50, 100, 150*, 200, 250, 300*, 350, 400  |
|                   | 12                   | 10, 25, 50*, 100, 150, 200*, 250, 300    |
|                   | 20                   | 5, 10, 25*, 50, 100, 150*, 200, 250      |
| <i>n</i> -Caproic | 2                    | 16, 20, 22*, 24, 26, 30*, 32, 36         |
|                   | 6                    | 4, 6, 8*, 12, 16, 22*, 26, 30            |
|                   | 12                   | 1, 2, 4*, 6, 8, 12*, 16, 22              |
|                   | 20                   | 1, 2, 4*, 6, 8, 12*, 16, 20              |

\*Duplicates were tested at these concentrations

**Table S3. Treatments for Experiment 4 and measured initial conditions.**

| Treatment Number | pH                                                                                    | <i>n</i> -Butyric Acid<br>(uncharged acid <i>plus</i><br>conjugate base) | <i>n</i> -Caproic Acid<br>(uncharged acid <i>plus</i><br>conjugate base) | Autoclaved?<br>(Y/N) |
|------------------|---------------------------------------------------------------------------------------|--------------------------------------------------------------------------|--------------------------------------------------------------------------|----------------------|
| 1                | Low (pH=4.72)                                                                         | Spiked<br>(269 mM)                                                       | Spiked<br>(22.5 mM)                                                      | N                    |
| 2                | Low (pH=5.03)                                                                         | No amendment<br>(27.5 mM)                                                | No amendment<br>(3.1 mM)                                                 | N                    |
| 3                | Raised pH after adding<br>carboxylic acids to equal<br>pH of Treatment 4<br>(pH=6.30) | Spiked<br>(243 mM)                                                       | Spiked<br>(30.1 mM)                                                      | N                    |
| 4                | No adjustment<br>(pH=6.40)                                                            | No amendment<br>(36.1 mM)                                                | No amendment<br>(4.2 mM)                                                 | N                    |
| 5                | No adjustment<br>(pH=6.50)                                                            | No amendment<br>(16.7 mM)                                                | No amendment<br>(1.7 mM)                                                 | Y                    |

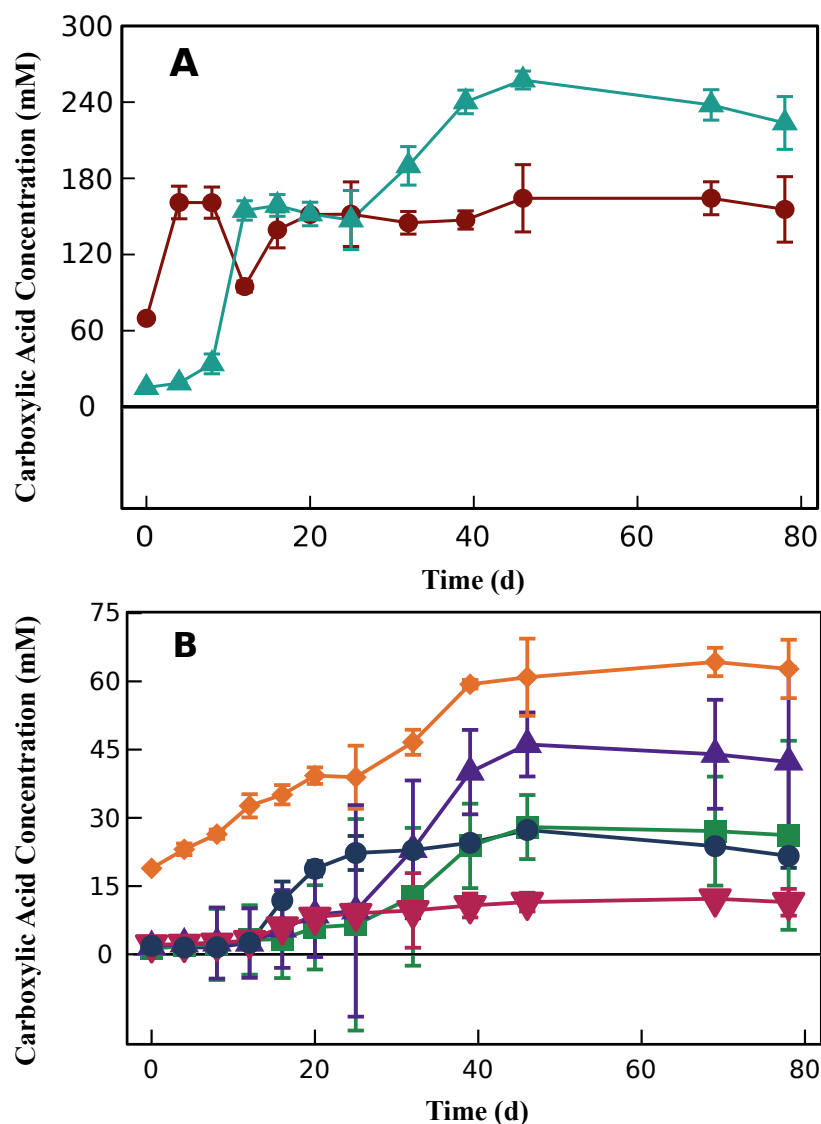

**Figure S1. Accumulation of carboxylic acids from batch fermentation of HFM at 30°C.** Panel A shows concentrations of acetic acid (●) and *n*-butyric acid (▲). Panel B shows concentrations of propionic acid (◆), *i*-butyric acid (■), *i*-valeric acid (▲), *n*-valeric acid (▼), and *n*-caproic acid (●). Concentrations represent the total concentrations of uncharged acid *plus* conjugate base. Error bars show the standard deviation of three biological replicates. Note that the scale of the y-axis is different in each panel.

**Table S4. Individual model parameters and statistics at three different pH levels for inactivation of *Ascaris* eggs when exposed to *n*-butyric acid and *n*-caproic acid for 3 days at 37°C.**

| pH | Parameter <i>a</i><br>(SE <sup>a</sup> ) | <i>p</i> -value <i>a</i> | Parameter <i>b</i><br>(SE <sup>a</sup> ) | <i>p</i> -value <i>b</i> |
|----|------------------------------------------|--------------------------|------------------------------------------|--------------------------|
| 2  | 0.0997<br>(1.40 x 10 <sup>-2</sup> )     | 1.41 x 10 <sup>-8*</sup> | 146<br>(1.06)                            | < 2 x 10 <sup>-16*</sup> |
| 4  | 0.0936<br>(1.50 x 10 <sup>-2</sup> )     | 2.28 x 10 <sup>-7*</sup> | 149<br>(0.944)                           | < 2 x 10 <sup>-16*</sup> |
| 5  | 0.106<br>(1.80 x 10 <sup>-2</sup> )      | 7.49 x 10 <sup>-7*</sup> | 148<br>(0.775)                           | < 2 x 10 <sup>-16*</sup> |

The model presented in the main text incorporated the data from all three pH levels and was not statistically different from the model shown here with data separated by pH ( $p=0.0748$ ).

<sup>a</sup>SE= standard error

\* Significant at  $\alpha=0.001$

**Table S5. Fraction of viable *A. suum* eggs for each treatment in Experiment 2 after exposure to carboxylic acids for 3 days at 37°C.**

| pH       | Uncharged Carboxylic Acid Concentration <sup>a</sup><br>(mM) (SD <sup>*</sup> ) | Total Carboxylic Acid Concentration <sup>a</sup><br>(Uncharged Acid <i>Plus</i> Conjugate Base)<br>(mM) (SD <sup>c</sup> ) | Fraction Viable <sup>b</sup><br>(SD <sup>c</sup> ) |
|----------|---------------------------------------------------------------------------------|----------------------------------------------------------------------------------------------------------------------------|----------------------------------------------------|
| 2        | 114 (1.41)                                                                      | 474 (6.70)                                                                                                                 | 0.958 (0.046)                                      |
|          | 151 (7.95)                                                                      | 630 (33.4)                                                                                                                 | 0.376 (0.118)                                      |
|          | 189 (8.06)                                                                      | 786 (34.2)                                                                                                                 | 0.00377 (0.00144)                                  |
|          | 230 (2.85)                                                                      | 958 (12.1)                                                                                                                 | 0.00123 <sup>d</sup> (0)                           |
|          | 267 (2.08)                                                                      | 1111 (8.49)                                                                                                                | 0.00132 <sup>d</sup> (0)                           |
| 4        | 110 (1.94)                                                                      | 526 (10.9)                                                                                                                 | 0.955 (0.0312)                                     |
|          | 152 (2.04)                                                                      | 722 (10.3)                                                                                                                 | 0.453 (0.0368)                                     |
|          | 188 (1.26)                                                                      | 916 (5.75)                                                                                                                 | 0.00463 (0.00229)                                  |
|          | 226 (1.22)                                                                      | 1108 (5.82)                                                                                                                | 0.00136 <sup>d</sup> (0)                           |
|          | 268 (1.53)                                                                      | 1317 (7.99)                                                                                                                | 0.00210 <sup>d</sup> (0)                           |
| 5        | 106 (1.36)                                                                      | 1199 (15.5)                                                                                                                | 0.949 (0.0325)                                     |
|          | 147 (1.77)                                                                      | 1636 (20.5)                                                                                                                | 0.532 (0.0364)                                     |
|          | 180 (5.06)                                                                      | 2093 (59.3)                                                                                                                | 0.0143 (0.00783)                                   |
|          | 209 (2.54)                                                                      | 2509 (30.1)                                                                                                                | 0.00151 <sup>d</sup> (0)                           |
|          | 246 (2.07)                                                                      | 2946 (24.6)                                                                                                                | 0.00161 <sup>d</sup> (0)                           |
| Controls |                                                                                 |                                                                                                                            | 0.856 (0.013)                                      |

<sup>a</sup> Concentrations shown are combined concentrations of *n*-butyric acid and *n*-caproic acid. Each solution contained 10 mM *n*-butyric acid for every 1 mM *n*-caproic acid.

<sup>b</sup> Fraction viable is normalized to the average viability of the controls (*A. suum* eggs suspended in deionized water for 3 days at 37°C).

<sup>c</sup> SD= standard deviation of three replicates.

<sup>d</sup> Viability below detection limit

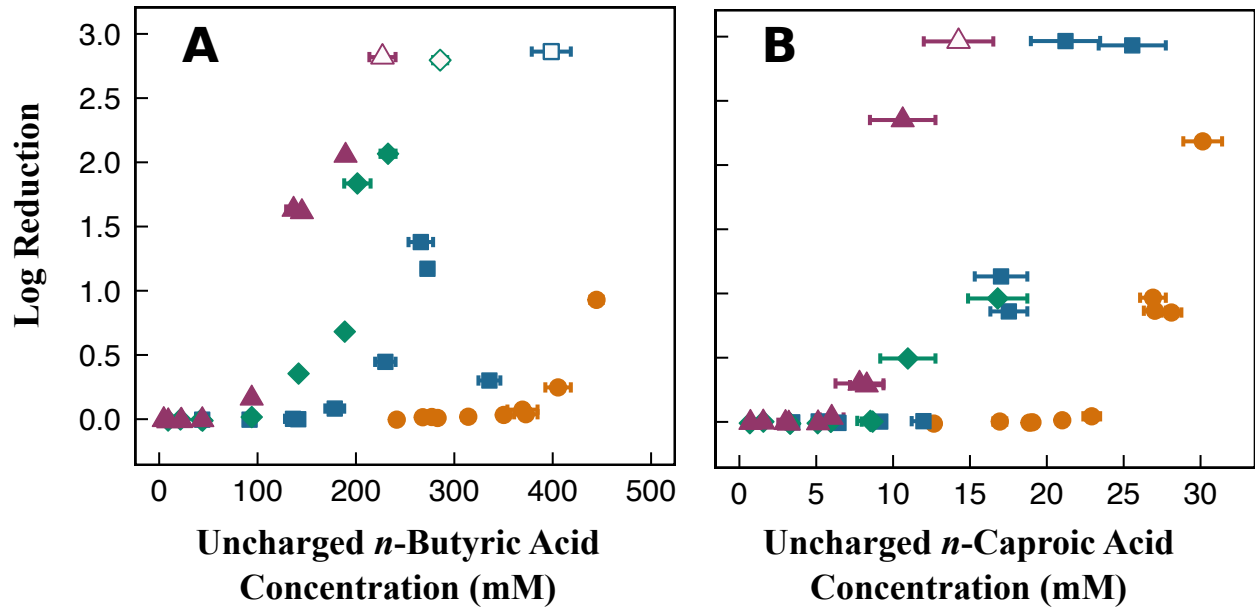

**Figure S2. Log Reduction of *Ascaris* eggs due to exposure to *n*-butyric acid (A) and *n*-caproic acid (B).** *Ascaris* eggs were exposed to carboxylic acids at 30°C for four different exposure times: 2 days (●), 6 days (■), 12 days (◆), and 20 days (▲). Open symbols indicate viability below the detection limit. The carboxylic acid concentration shown is the average of measurements made before and after the exposure period for each treatment, and the x-error bar shows the range between the two measurements. Replicate treatments are shown as individual points.



**Table S6. Fraction of viable *A. suum* eggs for each treatment in Experiment 3.**

| <i>n</i> -Butyric Acid |                                                                          |                              | <i>n</i> -Caproic Acid |                                                                          |                              |
|------------------------|--------------------------------------------------------------------------|------------------------------|------------------------|--------------------------------------------------------------------------|------------------------------|
| Exposure Time (d)      | Average Uncharged <i>n</i> -Butyric Acid Concentration <sup>a</sup> (mM) | Fraction Viable <sup>b</sup> | Exposure Time (d)      | Average Uncharged <i>n</i> -Caproic Acid Concentration <sup>a</sup> (mM) | Fraction Viable <sup>b</sup> |
| 2                      | 241                                                                      | 1.00                         | 2                      | 12.7                                                                     | 1.00                         |
|                        | 268                                                                      | 0.966                        |                        | 16.9                                                                     | 0.993                        |
|                        | 277                                                                      | 0.962                        |                        | 18.9                                                                     | 1.000                        |
|                        | 283                                                                      | 0.979                        |                        | 19.1                                                                     | 1.000                        |
|                        | 314                                                                      | 0.957                        |                        | 21.0                                                                     | 0.971                        |
|                        | 350                                                                      | 0.927                        |                        | 22.9                                                                     | 0.905                        |
|                        | 373                                                                      | 0.915                        |                        | 27.0                                                                     | 0.136                        |
|                        | 369                                                                      | 0.843                        |                        | 26.9                                                                     | 0.108                        |
|                        | 405                                                                      | 0.566                        |                        | 28.1                                                                     | 0.141                        |
|                        | 444                                                                      | 0.118                        |                        | 30.1                                                                     | 0.007                        |
|                        | Controls                                                                 | 0.908 (0.0108 <sup>d</sup> ) |                        | Controls                                                                 | 0.908 (0.0108 <sup>d</sup> ) |
| 6                      | 43.7                                                                     | 1.00                         | 6                      | 3.44                                                                     | 1.00                         |
|                        | 91.9                                                                     | 1.00                         |                        | 5.16                                                                     | 0.991                        |
|                        | 141                                                                      | 1.00                         |                        | 6.45                                                                     | 1.00                         |
|                        | 136                                                                      | 0.994                        |                        | 6.37                                                                     | 1.00                         |
|                        | 178                                                                      | 0.827                        |                        | 9.16                                                                     | 0.994                        |
|                        | 230                                                                      | 0.358                        |                        | 12.0                                                                     | 0.987                        |
|                        | 266                                                                      | 0.042                        |                        | 17.5                                                                     | 0.138                        |
|                        | 273                                                                      | 0.067                        |                        | 17.0                                                                     | 0.074                        |
|                        | 336                                                                      | 0.500                        |                        | 21.2                                                                     | 0.00108                      |
|                        | 399                                                                      | 0.00126 <sup>c</sup>         |                        | 25.6                                                                     | 0.00117                      |
|                        | Controls                                                                 | 0.917 (0.0104 <sup>d</sup> ) |                        | Controls                                                                 | 0.917 (0.0104 <sup>d</sup> ) |
| 12                     | 9.06                                                                     | 1.00                         | 12                     | 0.680                                                                    | 1.00                         |
|                        | 21.6                                                                     | 1.00                         |                        | 1.56                                                                     | 0.995                        |
|                        | 42.7                                                                     | 1.00                         |                        | 3.31                                                                     | 1.00                         |
|                        | 44.0                                                                     | 1.00                         |                        | 3.28                                                                     | 1.00                         |
|                        | 94.1                                                                     | 0.963                        |                        | 5.09                                                                     | 1.00                         |
|                        | 142                                                                      | 0.442                        |                        | 5.95                                                                     | 0.999                        |
|                        | 189                                                                      | 0.208                        |                        | 8.52                                                                     | 0.982                        |
|                        | 201                                                                      | 0.015                        |                        | 8.67                                                                     | 0.995                        |
|                        | 233                                                                      | 0.009                        |                        | 11.0                                                                     | 0.321                        |
|                        | 286                                                                      | 0.00146 <sup>c</sup>         |                        | 16.8                                                                     | 0.109                        |
|                        | Controls                                                                 | 0.913 (0.0116 <sup>d</sup> ) |                        | Controls                                                                 | 0.913 (0.0116 <sup>d</sup> ) |
| 20                     | 4.66                                                                     | 1.00                         | 20                     | 0.718                                                                    | 1.00                         |
|                        | 9.26                                                                     | 1.00                         |                        | 1.56                                                                     | 1.00                         |
|                        | 22.6                                                                     | 1.00                         |                        | 3.00                                                                     | 1.00                         |
|                        | 22.2                                                                     | 1.00                         |                        | 3.21                                                                     | 1.00                         |
|                        | 43.9                                                                     | 1.00                         |                        | 5.12                                                                     | 1.00                         |
|                        | 94.1                                                                     | 0.688                        |                        | 6.01                                                                     | 0.925                        |
|                        | 145                                                                      | 0.024                        |                        | 7.81                                                                     | 0.502                        |
|                        | 137                                                                      | 0.023                        |                        | 8.28                                                                     | 0.518                        |
|                        | 189                                                                      | 0.009                        |                        | 10.6                                                                     | 0.004                        |
|                        | 227                                                                      | 0.00137 <sup>c</sup>         |                        | 14.3                                                                     | 0.00099 <sup>c</sup>         |
|                        | Controls                                                                 | 0.904 (0.0276 <sup>d</sup> ) |                        | Controls                                                                 | 0.904 (0.0276 <sup>d</sup> ) |

<sup>a</sup> Concentration is the average of measurements made before and after the exposure period.

<sup>b</sup> Fraction viable is normalized to the average viability of the controls for each exposure period.

<sup>c</sup> Viability below detection limit

<sup>d</sup> Standard deviation of three replicates

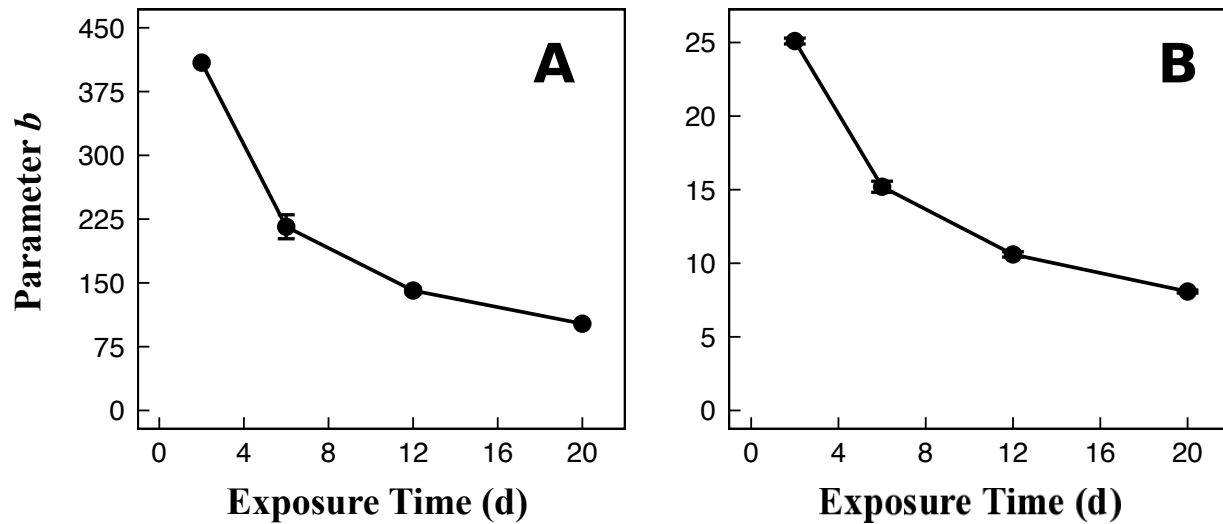

**Figure S3. Model parameter  $b$  at the four different exposure times tested in Experiment 2 for  $n$ -butyric acid (A) and  $n$ -caproic acid (B). Error bars represent the standard error of the parameter  $b$ .**

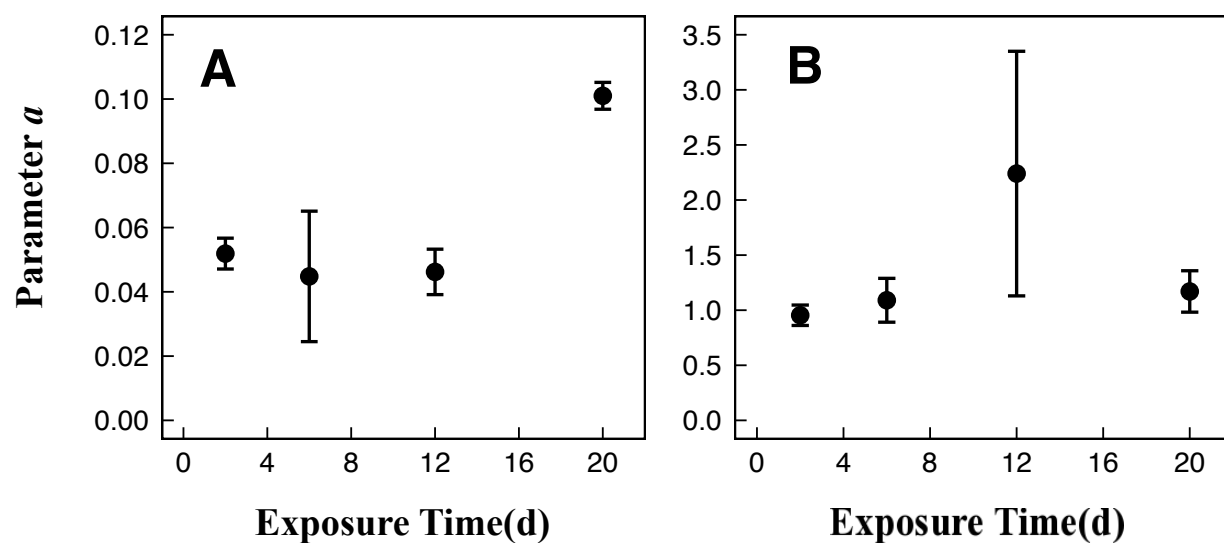

**Figure S4. Model parameter  $a$  at the four different exposure times tested in Experiment 2 for *n*-butyric acid (A) and *n*-caproic acid (B). Error bars represent the standard error of the parameter  $a$ .**

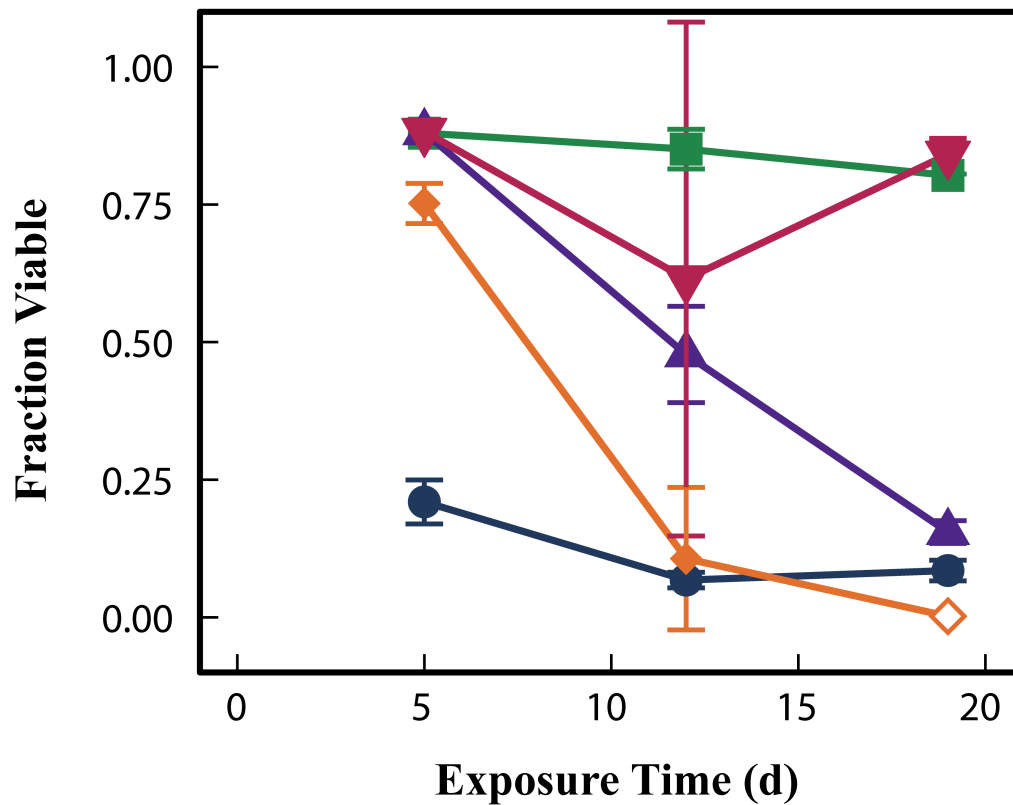

**Figure S5. Inactivation of *Ascaris* eggs in HFM after exposure times of 5, 12, and 19 days.** *A. suum* eggs were exposed to five treatments at 30°C : Treatment 1 with spiked acids and low pH (●); Treatment 2 with no added acids and low pH (■); Treatment 3 with spiked acids and natural pH (▲); Treatment 4 with no added acids and natural pH (◆); and Treatment 5 with autoclaved HFM, no added acids, and natural pH (▼). Error bars represent standard deviation of viabilities for three replicates. Open symbols indicate that viability was below the detection limit of 0.004.

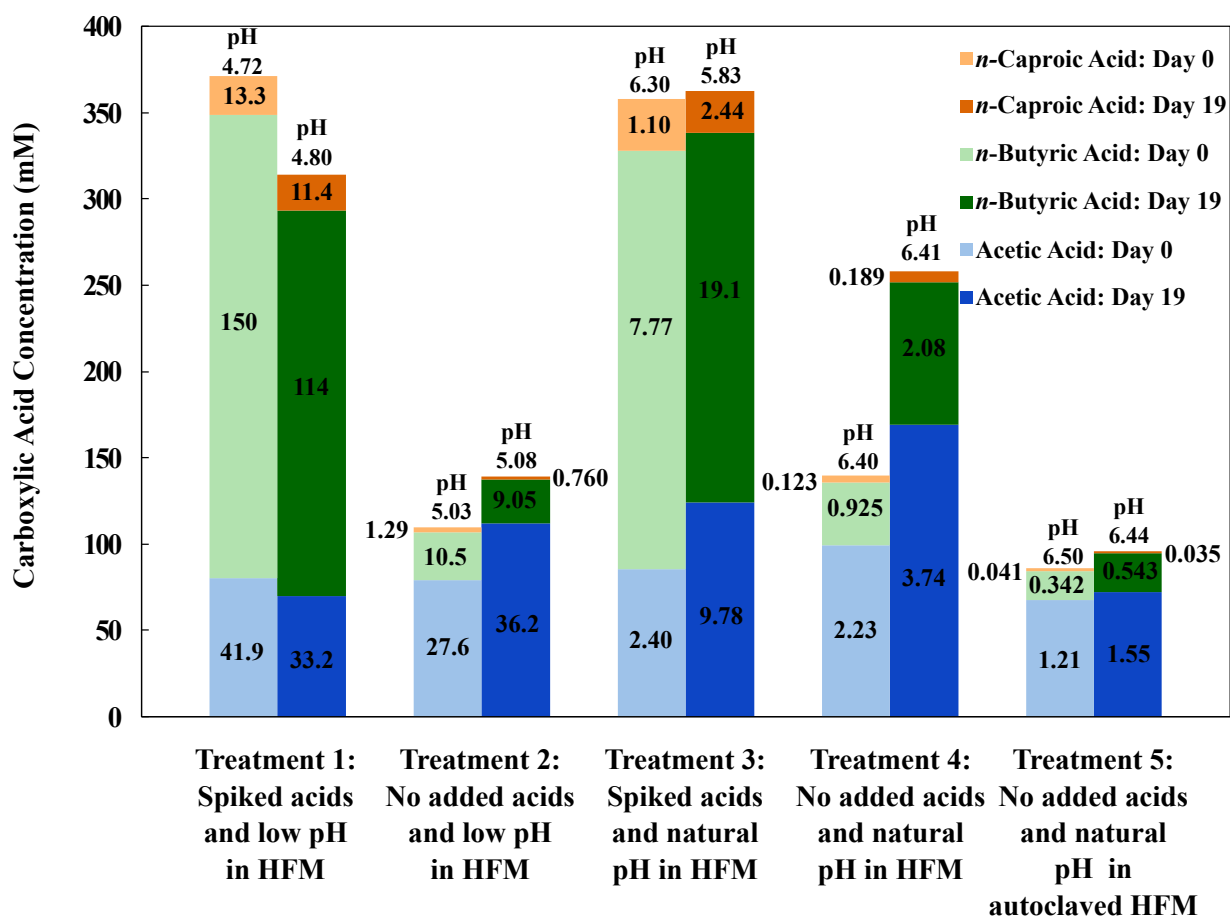

**Figure S6. Concentrations of carboxylic acids measured at onset of experiment and after 19-day exposure period for Experiment 4.** The height of each bar represents the total carboxylic acid concentration (uncharged acid *plus* conjugate base). The pH is shown on top of each bar, and the calculated uncharged carboxylic acid concentration is written within the bar.

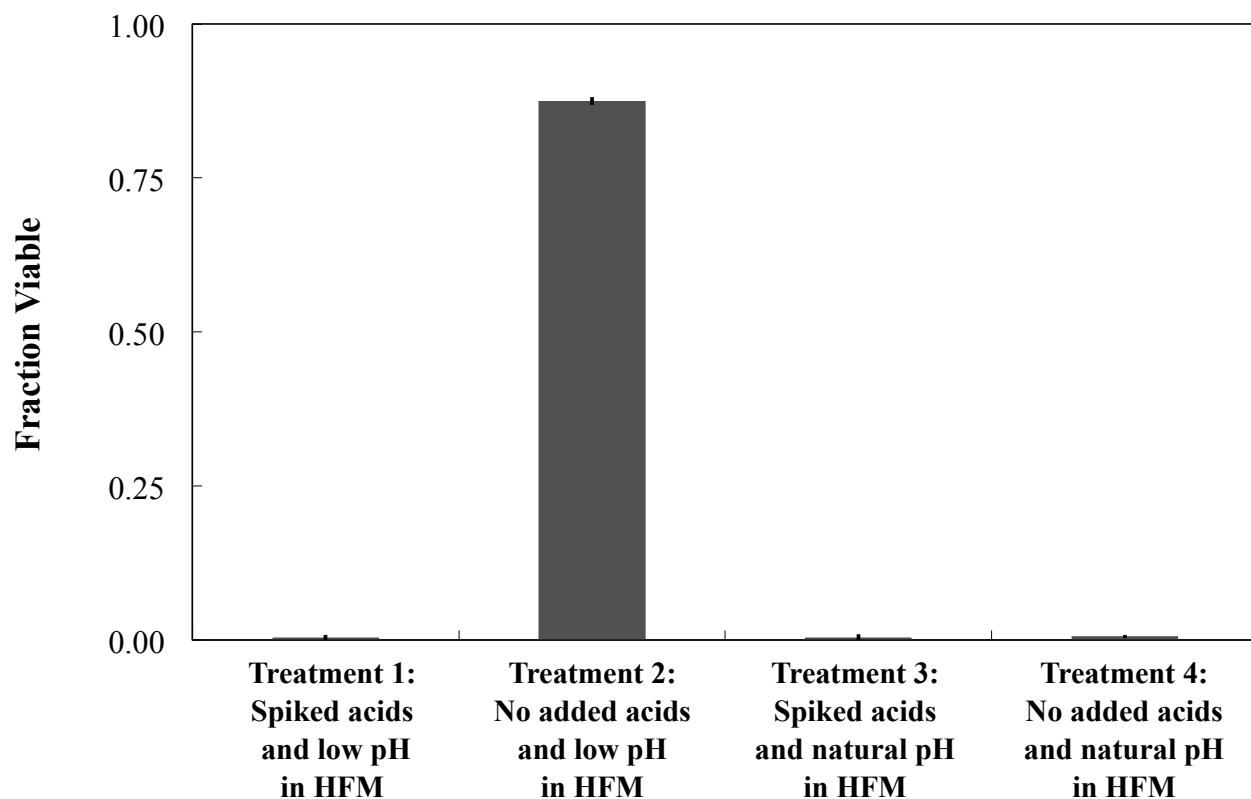

**Figure S7. Previous experiment inactivating *A. suum* eggs in HFM.** *A. suum* eggs were exposed to treatment conditions in HFM for 14 days at 30°C. For treatments with spiked acids, *n*-butyric acid and *n*-caproic acid were added to achieve final concentrations of 240 mM and 24 mM (uncharged acid *plus* conjugate base), respectively. For treatments with low pH, the pH was adjusted to 5.10 ( $\pm$  0.05) using HCl. All other methods were the same as those for Experiment 4. Error bars represent standard deviation of viabilities for three replicates. Viabilities for Treatments 1, 3, and 4 were 0.004, 0.004, and 0.003, respectively. The detection limit was 0.004.
